# Supplementary material
Source: PubMed Central journal article supplement (PMC4639927)

Supplementary Figure 1, Huang et al.

a

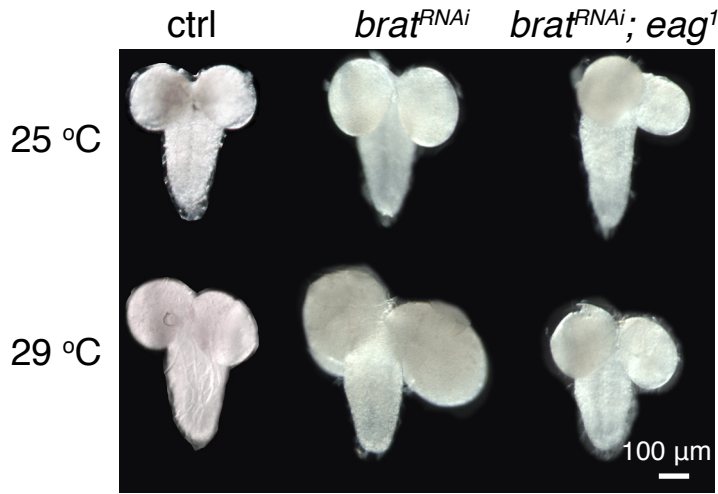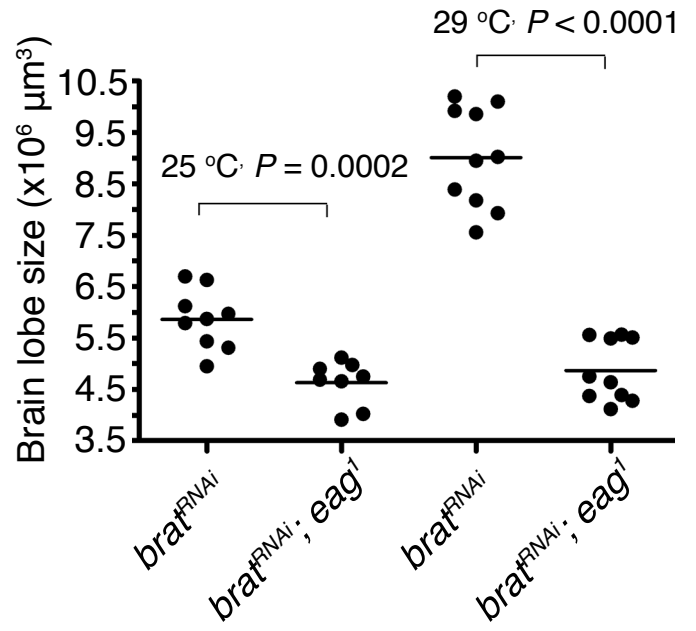

b

Larval brain tumor

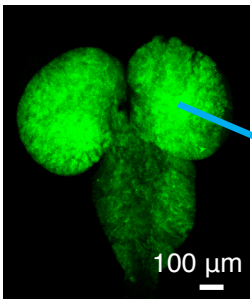

Implant

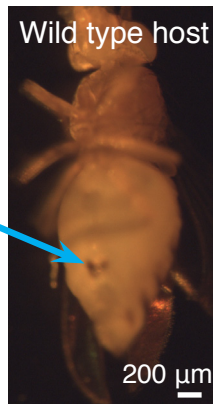

25 °C  
10 days

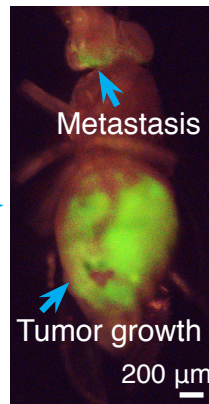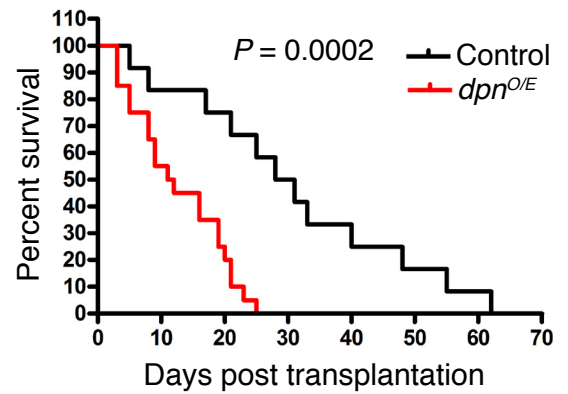

a

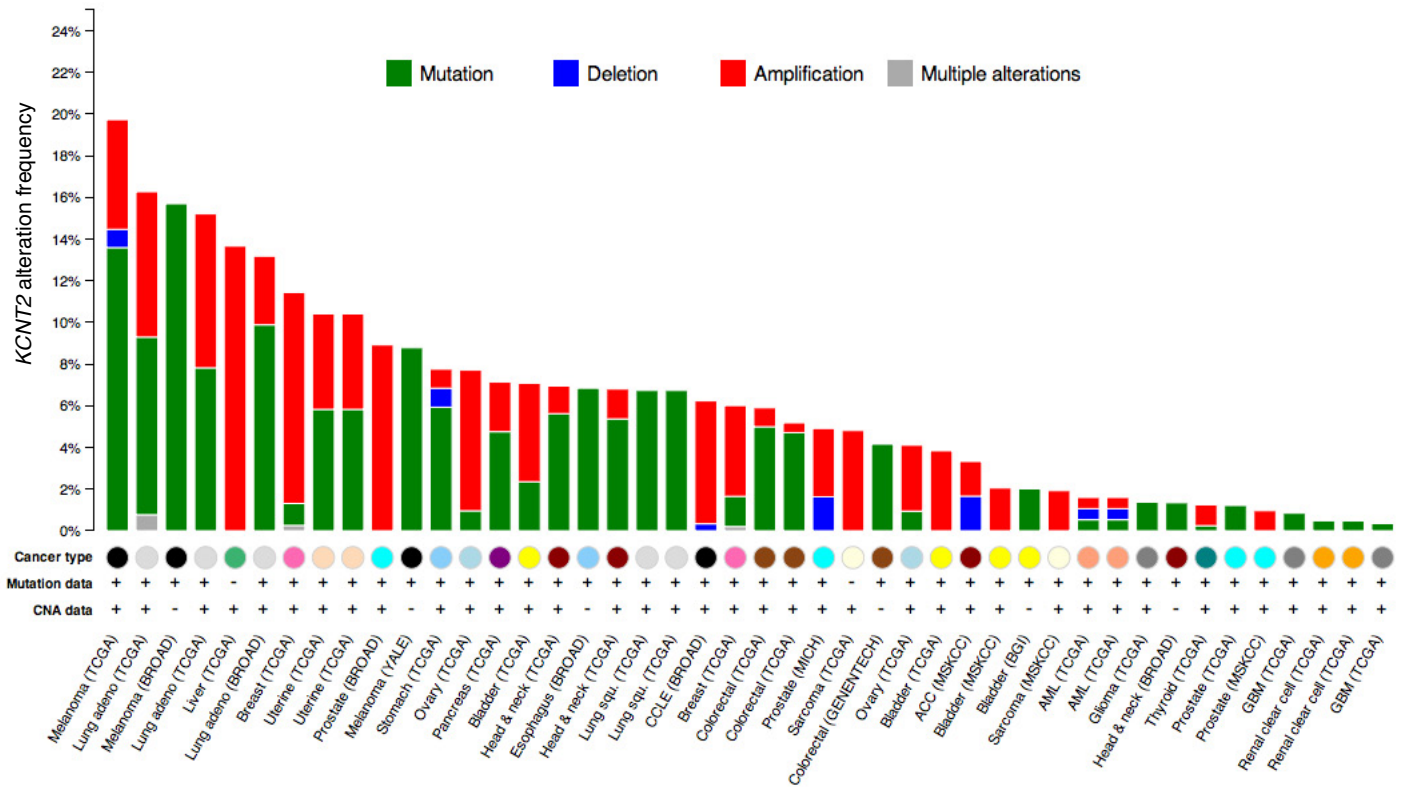

b

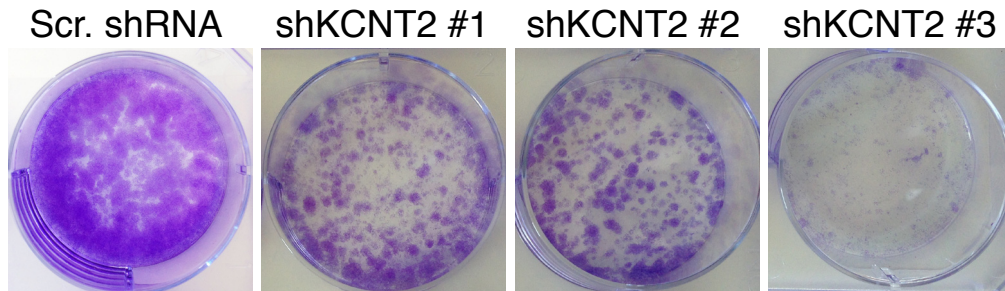

c

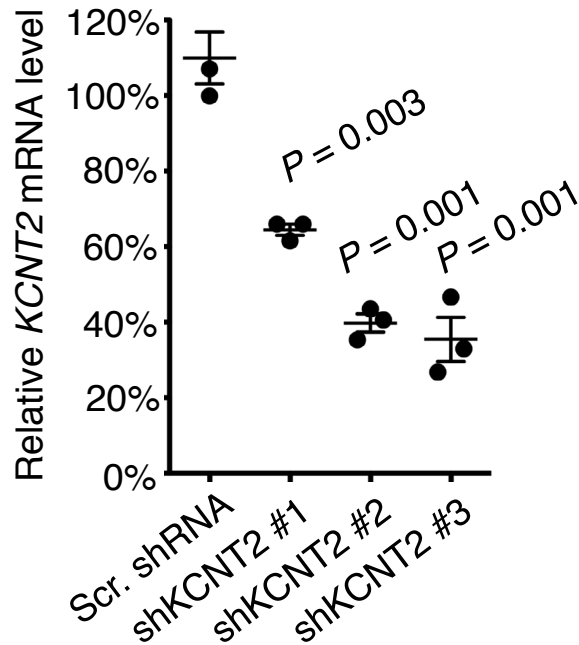

Supplementary Figure 3, Huang et al.

## Co-option of potassium channels to regulate mitotic cell volume dynamics

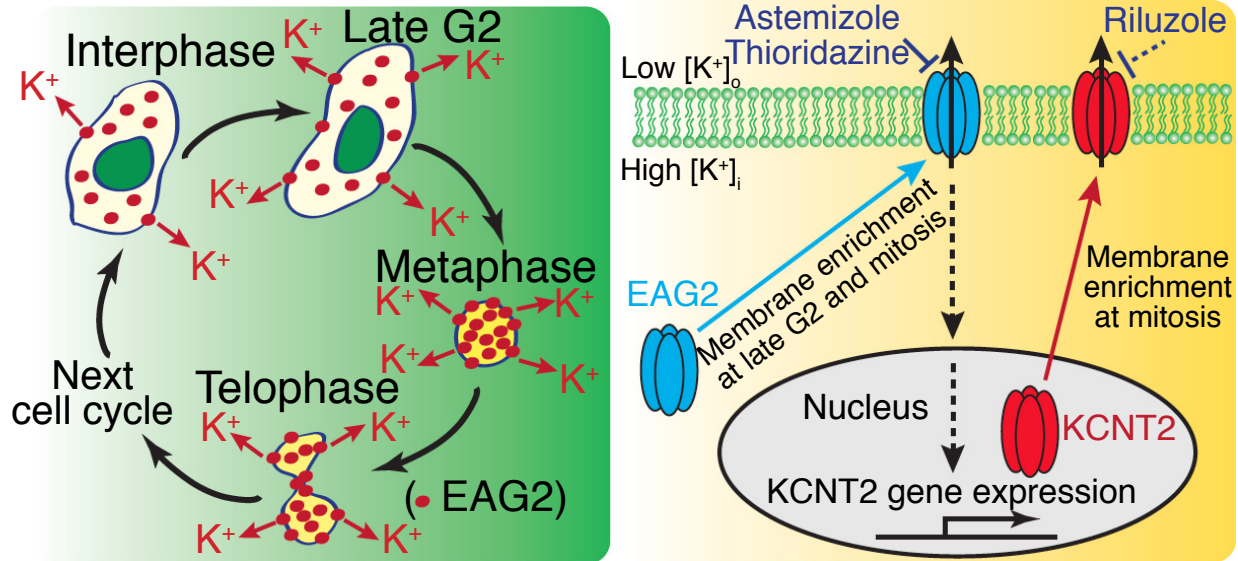

Supplementary Figure 4, Huang et al.

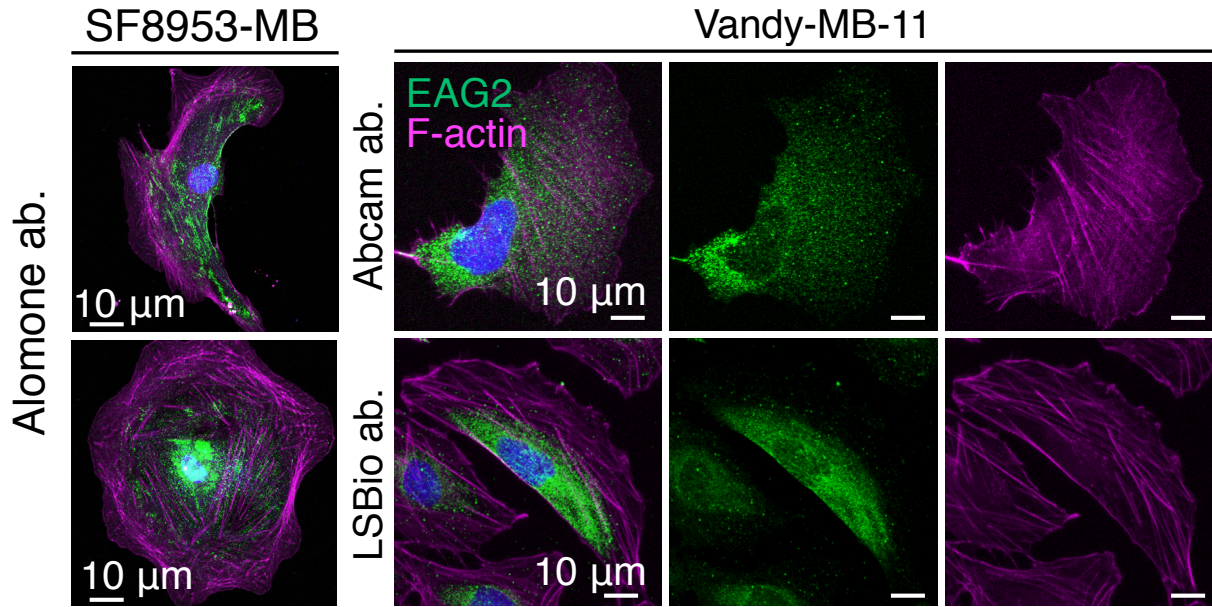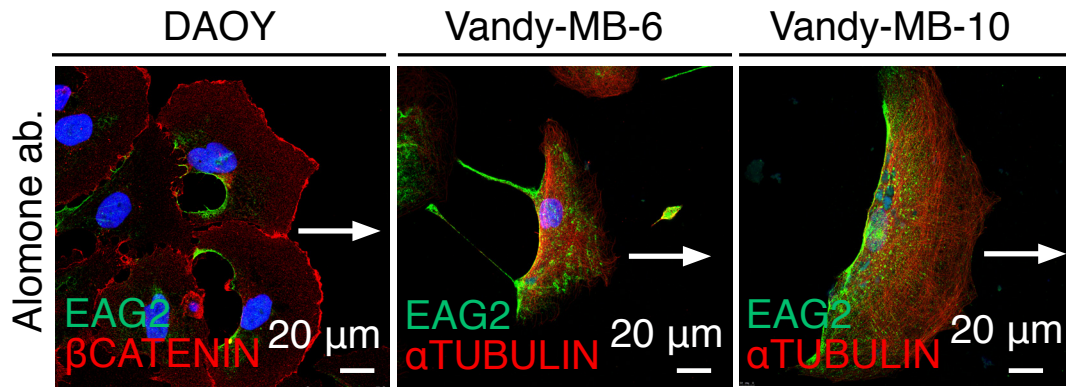

Supplementary Figure 5, Huang et al.

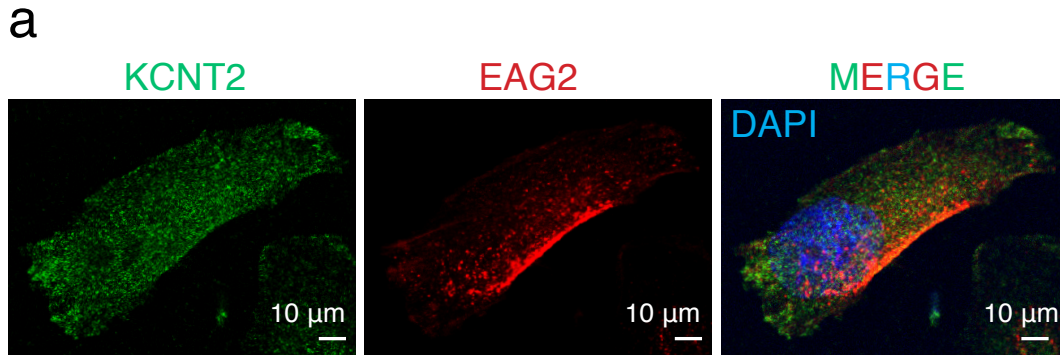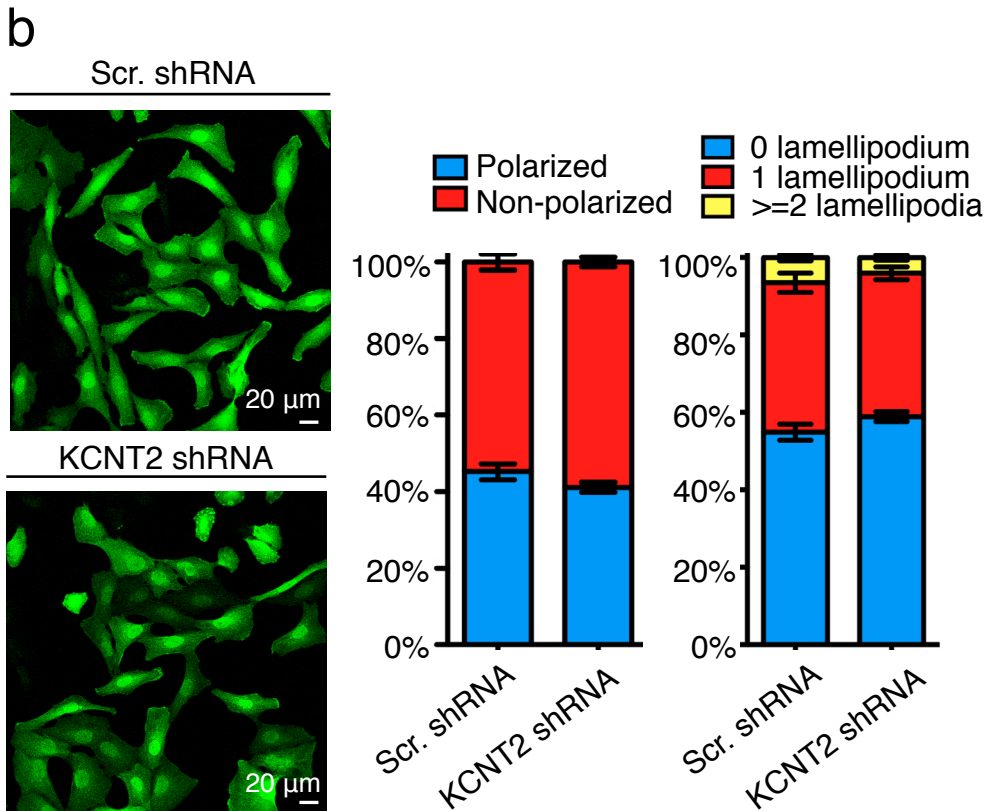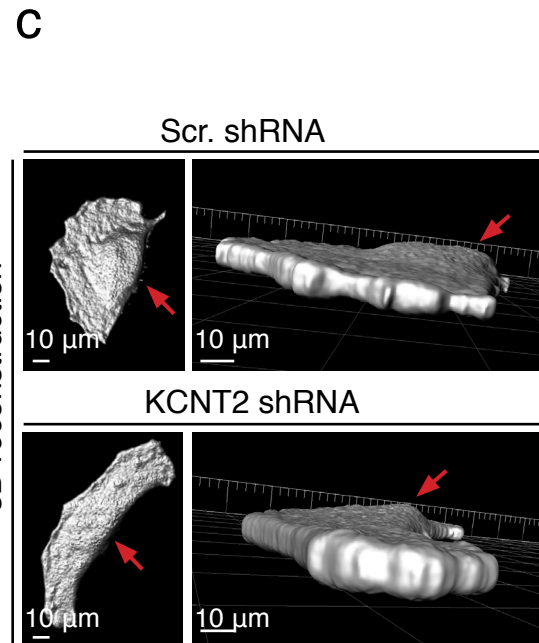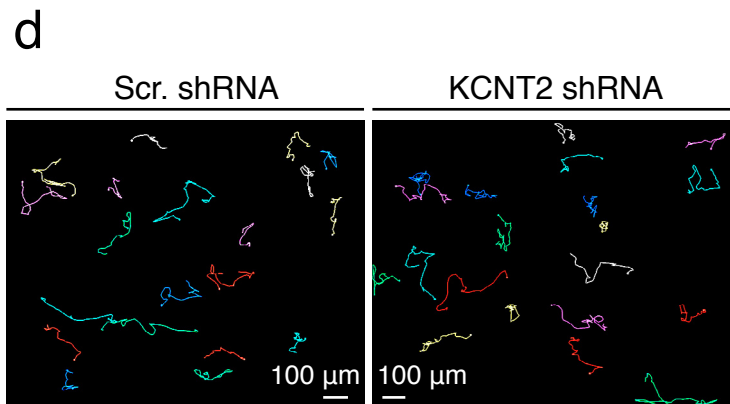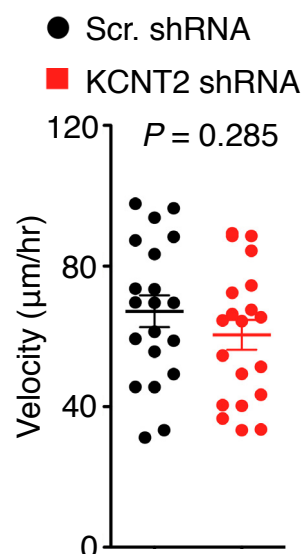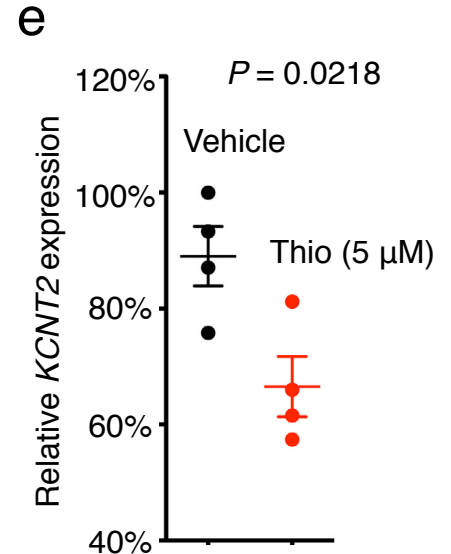

Supplementary Figure 6, Huang et al.

a

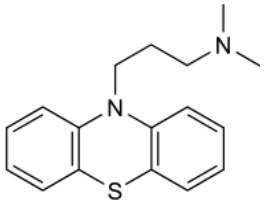

Promazine

b

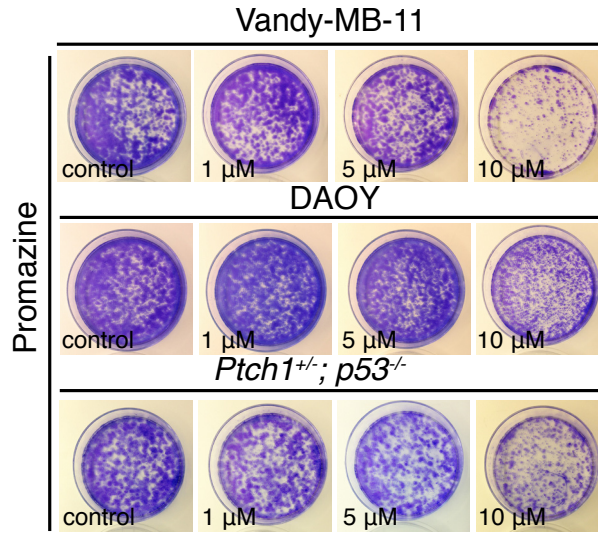

c

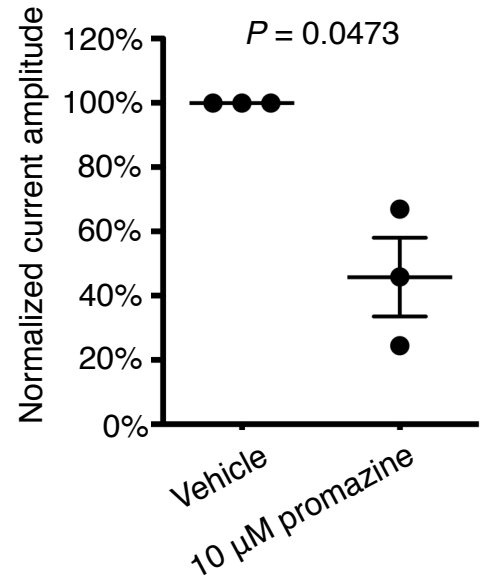

## Supplementary Figure 7, Huang et al.

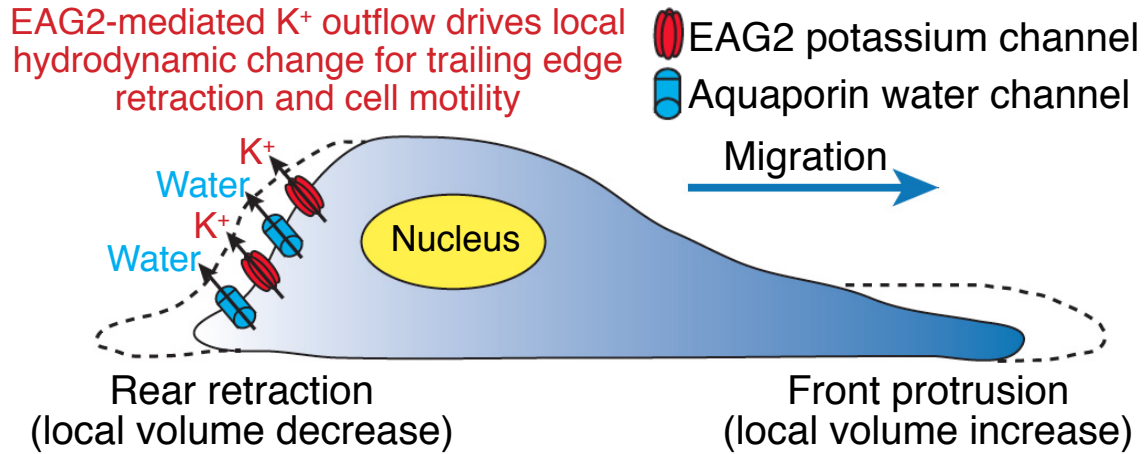

## Supplementary Figure 8, Huang et al.

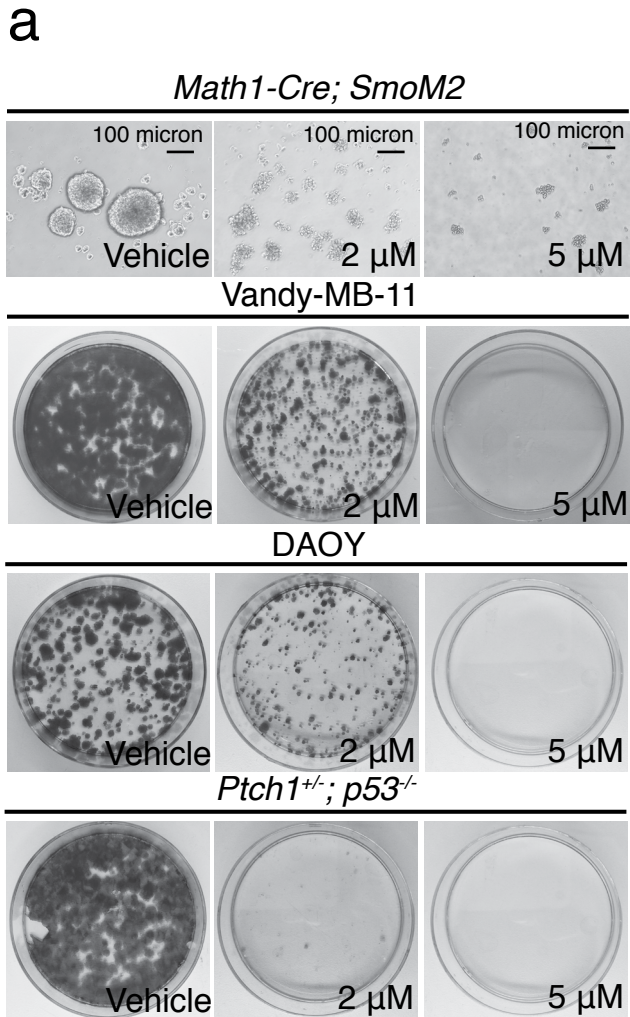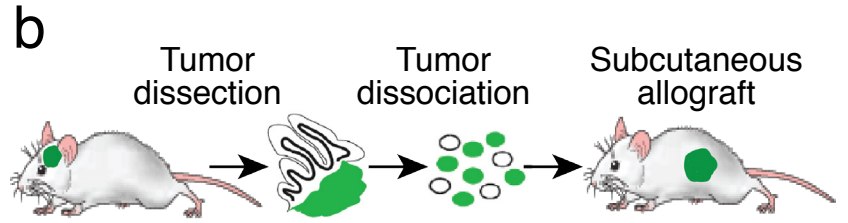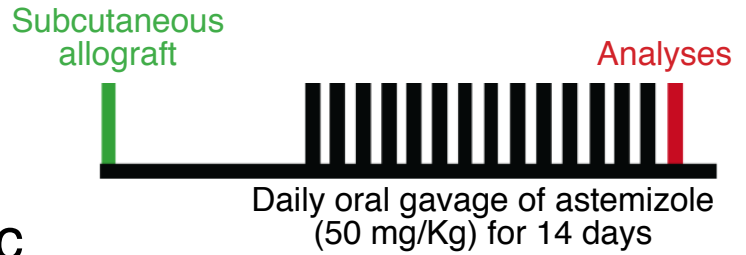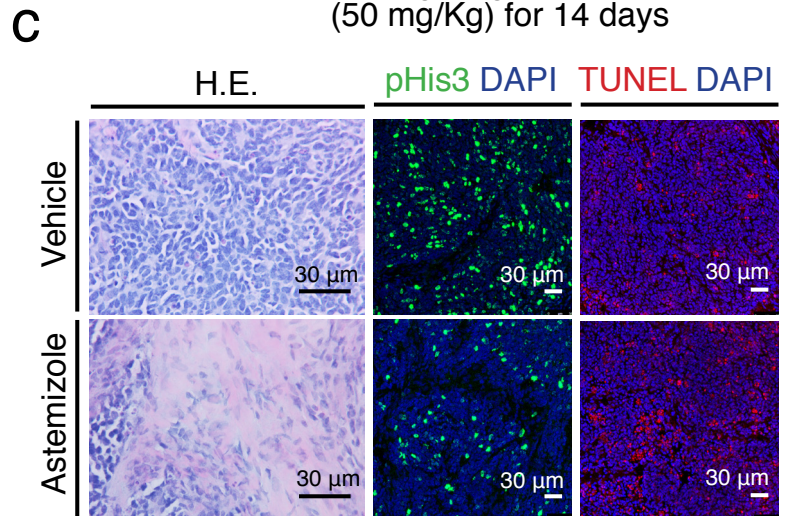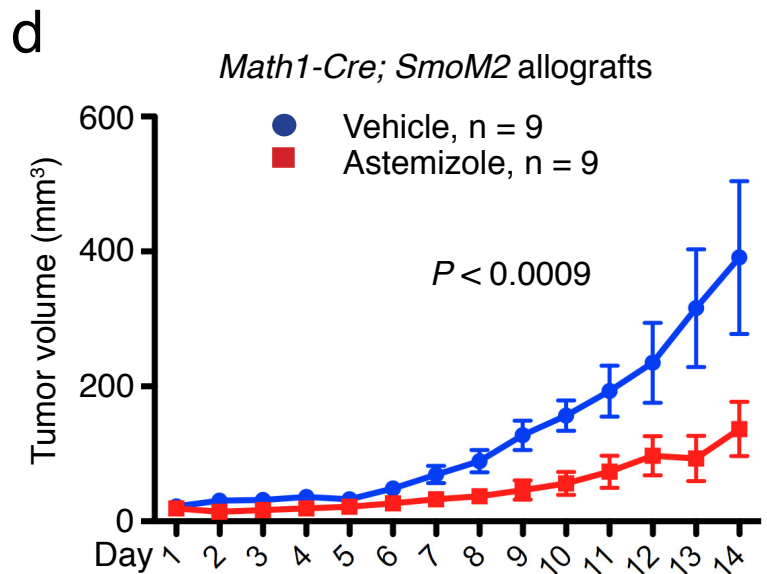



Supplementary Figure 9, Huang et al.

EAG2 blot

$\alpha$  Tubulin blot

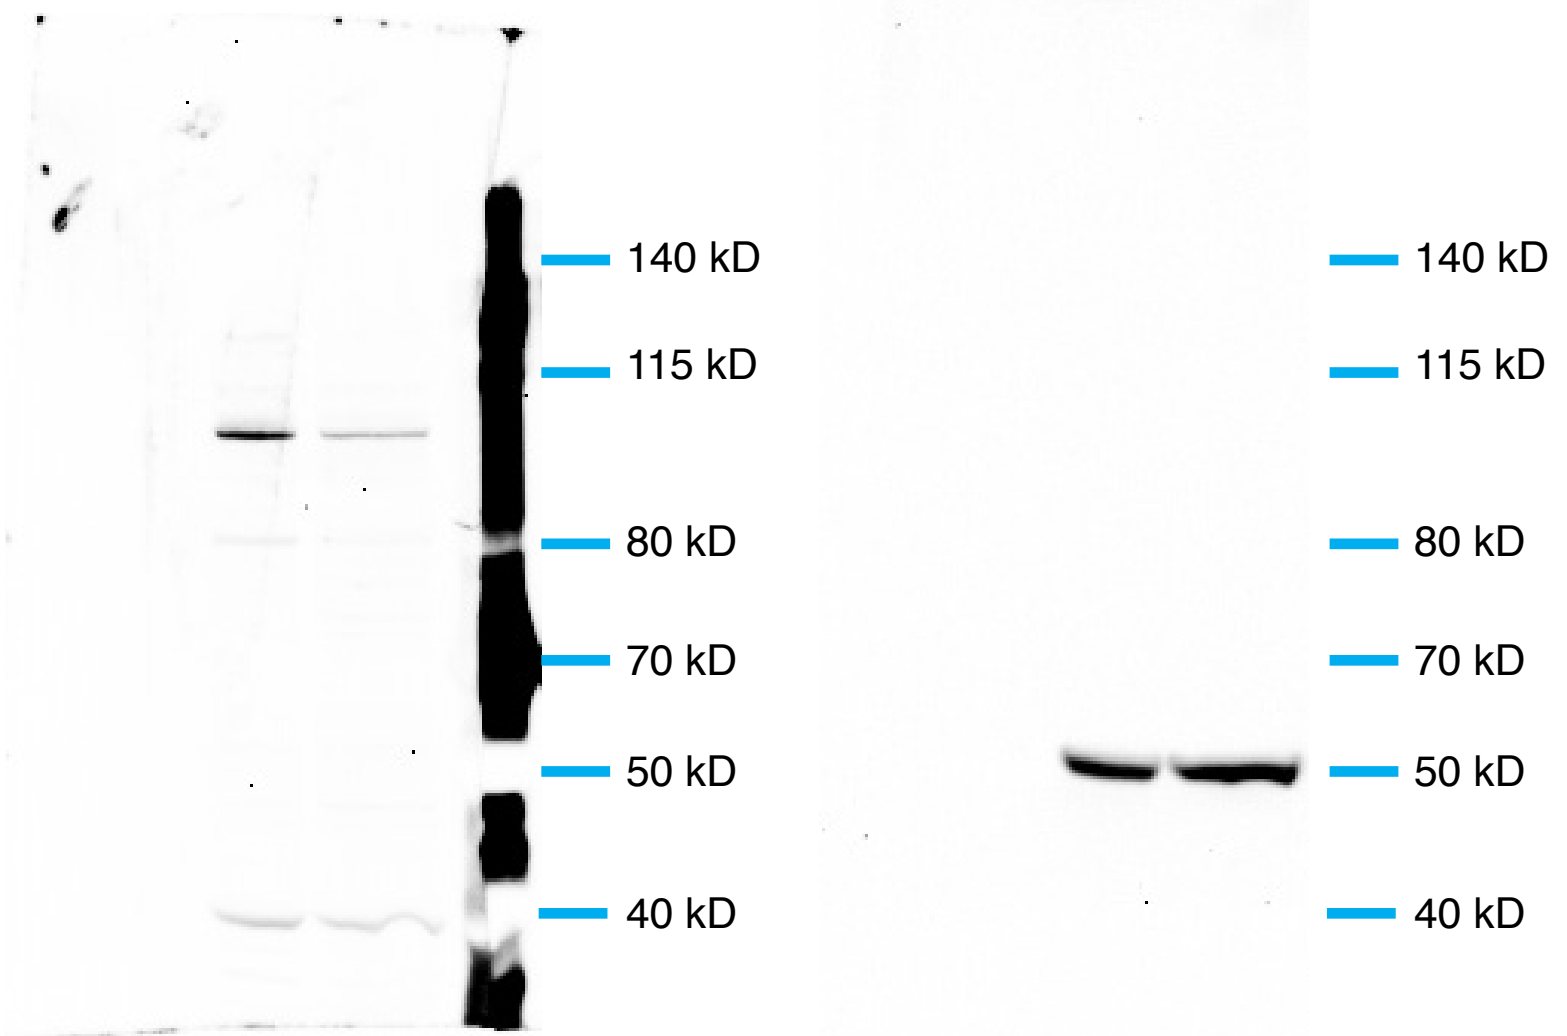

Supplement: NIHMS734844-supplement-Supplementary_figures.pdf [file NIHMS734844-supplement-Supplementary_figures.pdf]
